# Supplementary material for: A Skeletal Muscle-Mediated Anticontractile Response on Vascular Tone: Unraveling the Lactate-AMPK-NOS1 Pathway in Femoral Arteries
Source: PubMed Central journal article supplement (PMC11577611; doi:10.1093/function/zqae042), 2024-09-17
Supplement: zqae042_supplemental_file.pdf [file zqae042_supplemental_file.pdf]

**Suppl. Fig 1.** The images below are the original blots referenced in Figure 5D. Please note that although Membrane 3 (total nNOS and GAPDH) was not used as a representative image, it was used to normalize (yellow square) pNOS, which was also in Membrane 3. The first sample (arrow, control) was not considered for the quantification.

Memb 2 **Total protein** Memb 3

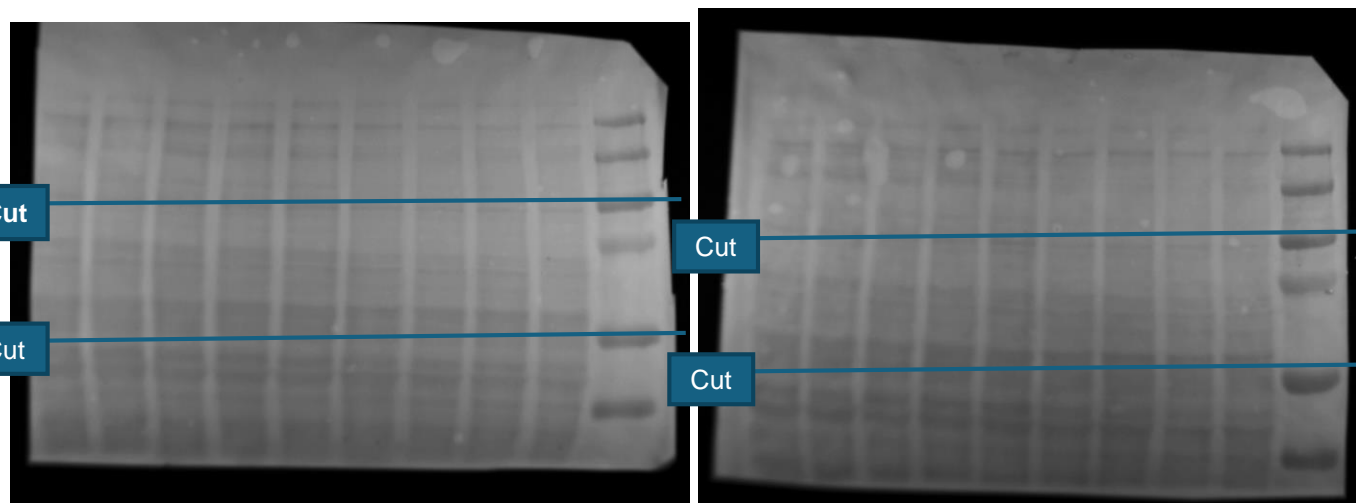

**Vehicle** **Lactate**

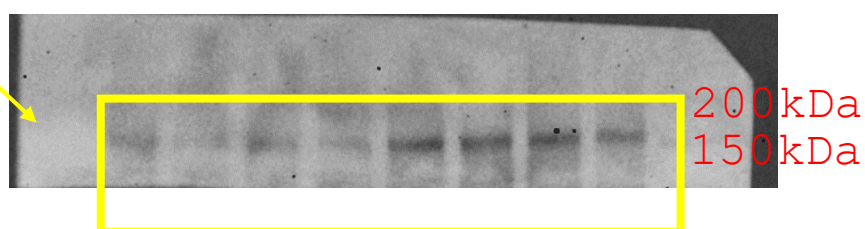

**nNOS<sup>total</sup> (160kDa)**  
*Representative image*

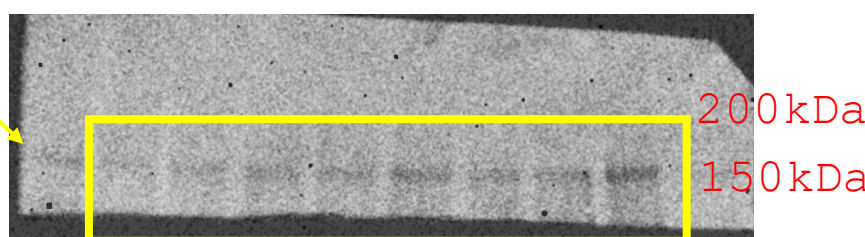

**nNOS<sup>total</sup> (160kDa)**

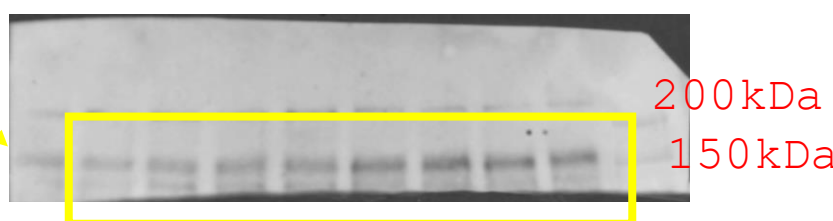

**nNOS<sup>S1417</sup> (160kDa)**  
*Representative image*

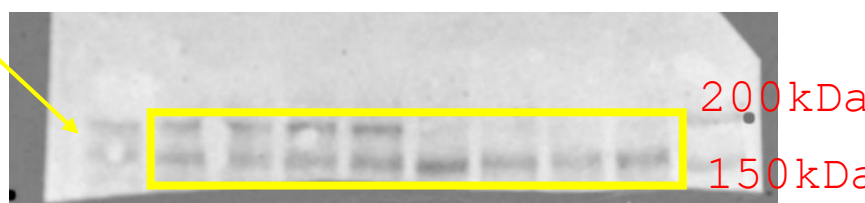

**nNOS<sup>S847</sup> (160kDa)**  
*Representative image*

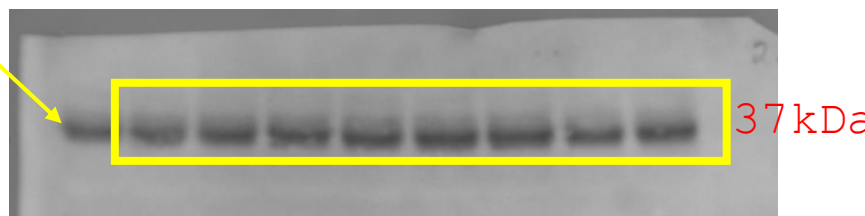

**GAPDH (36kDa)**  
*Representative image*

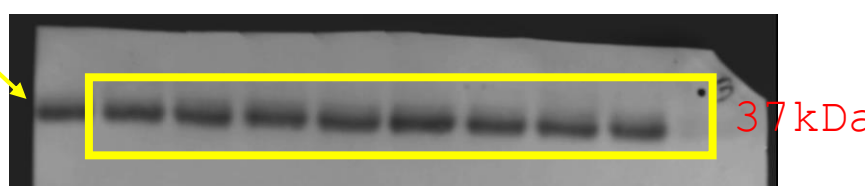

**GAPDH (36kDa)**

**Suppl. Fig 2.** The images below are the original blots referenced in Figure 6A. Please note that the first sample (arrow, control) was not considered for the quantification.

**nNOS Ser<sup>1417</sup> (160kDa)**

**Vehicle      Lactate      Lactate+  
Bay3827**

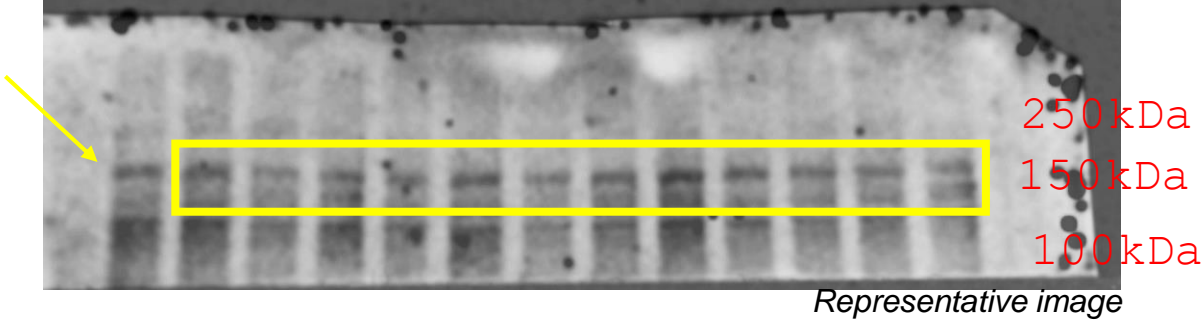

**nNOS<sup>total</sup> (160kDa)**

**Vehicle      Lactate      Lactate+  
Bay3827**

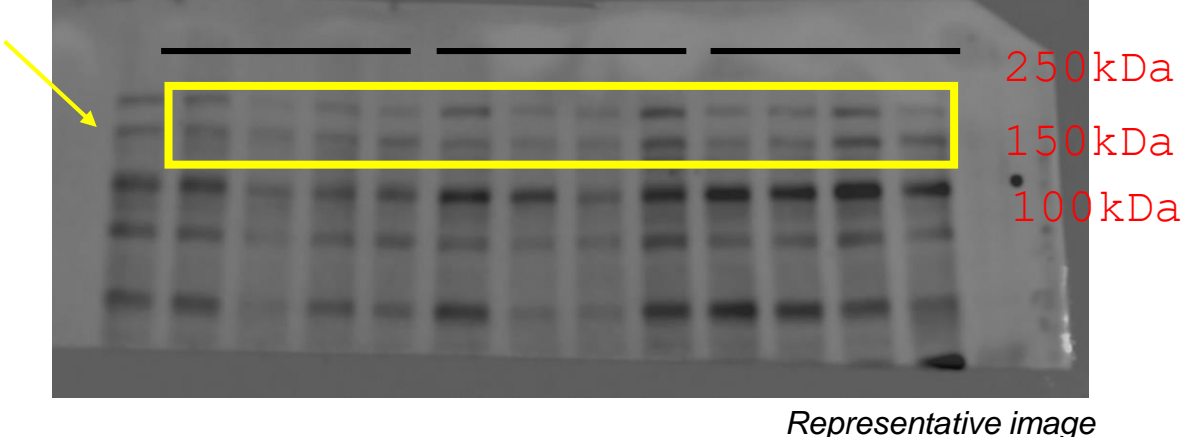

**GAPDH (36kDa)**

**Vehicle      Lactate      Lactate+  
Bay3827**

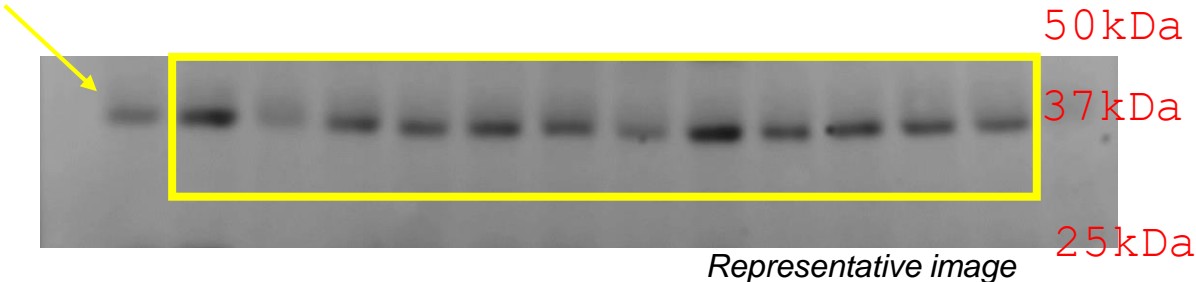

**Suppl. Fig 3.** The images below are the original blots referenced in Figure 6F.

### AMPK (63 kDa)

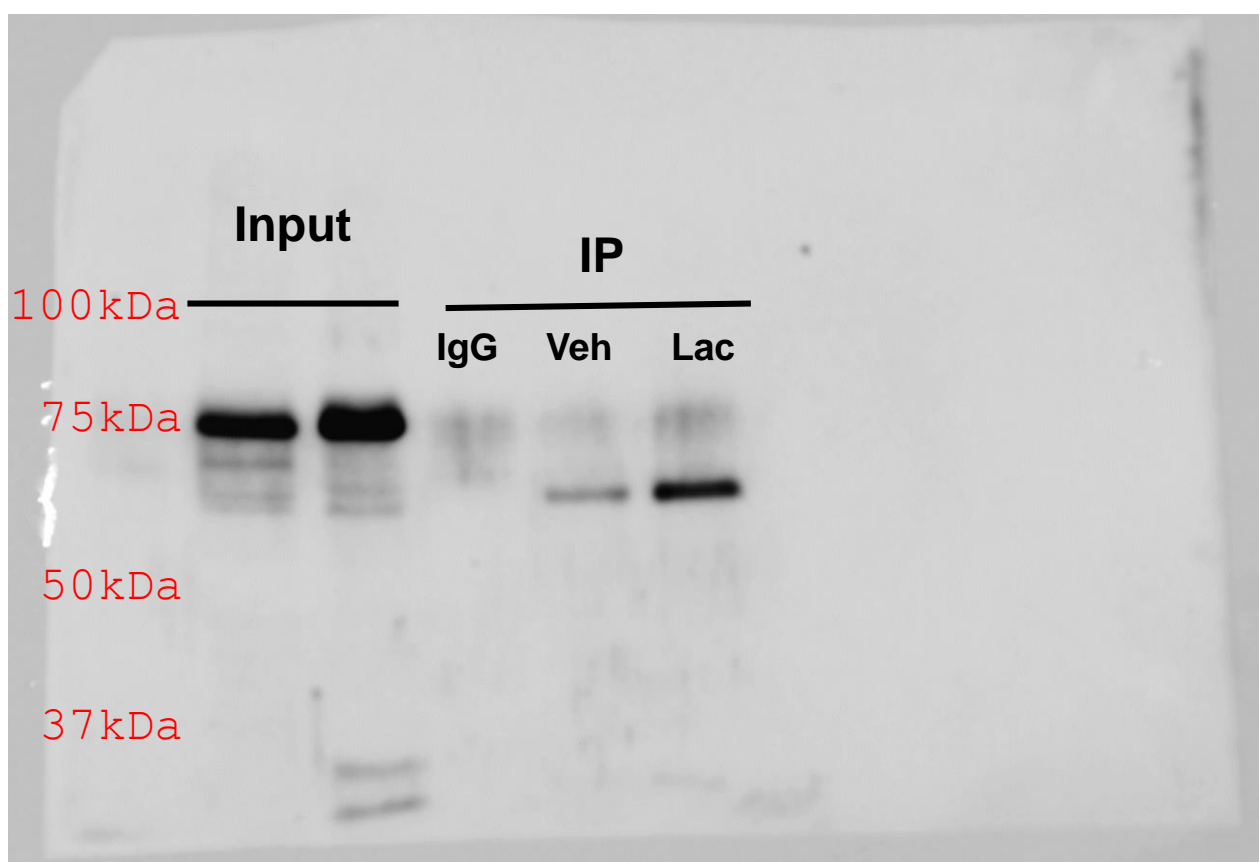

*Representative image*

Suppl. Fig 4. The images below are the original blots referenced in Figure 7B.

### nNOS<sup>total</sup> (160kDa)

**Femoral**

**Carotid**

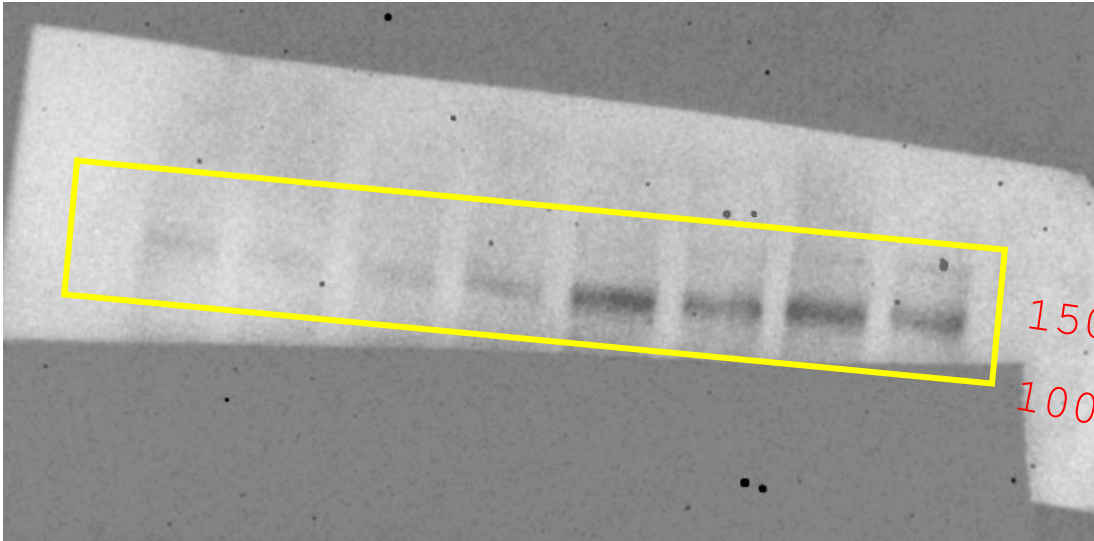

Representative image

### GAPDH (36kDa)

**Femoral**

**Carotid**

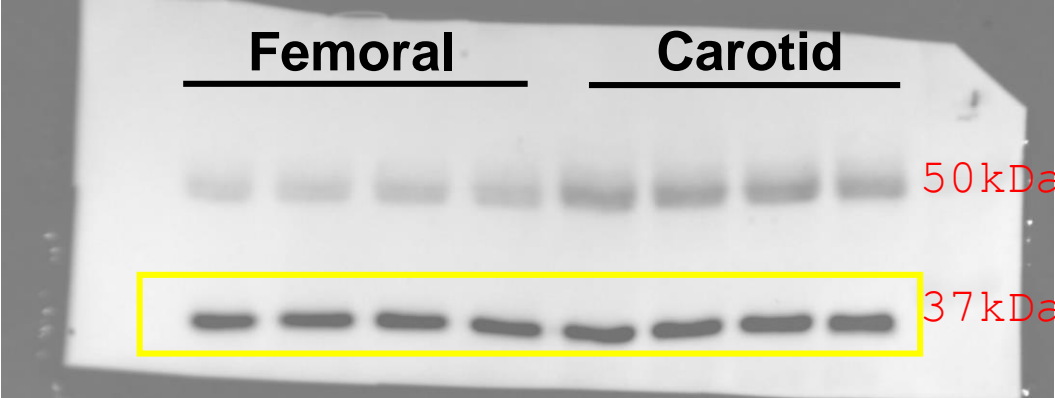

Representative image

### Total protein

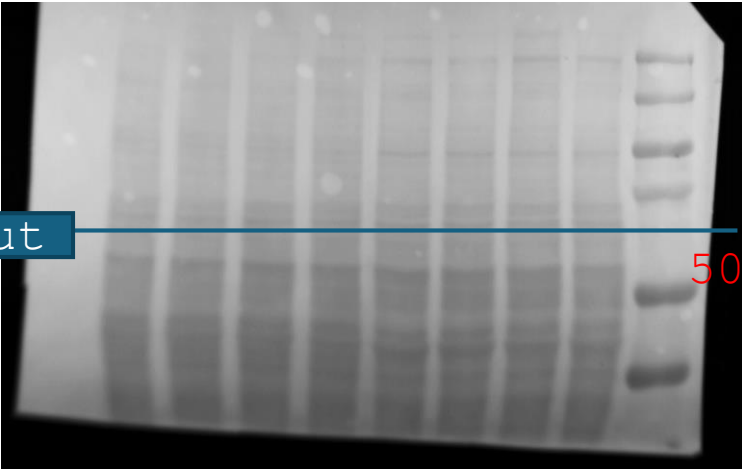

**Suppl. Fig 5.** The images below are the original blots referenced in Figure 7C.

### MnSOD (25kDa)

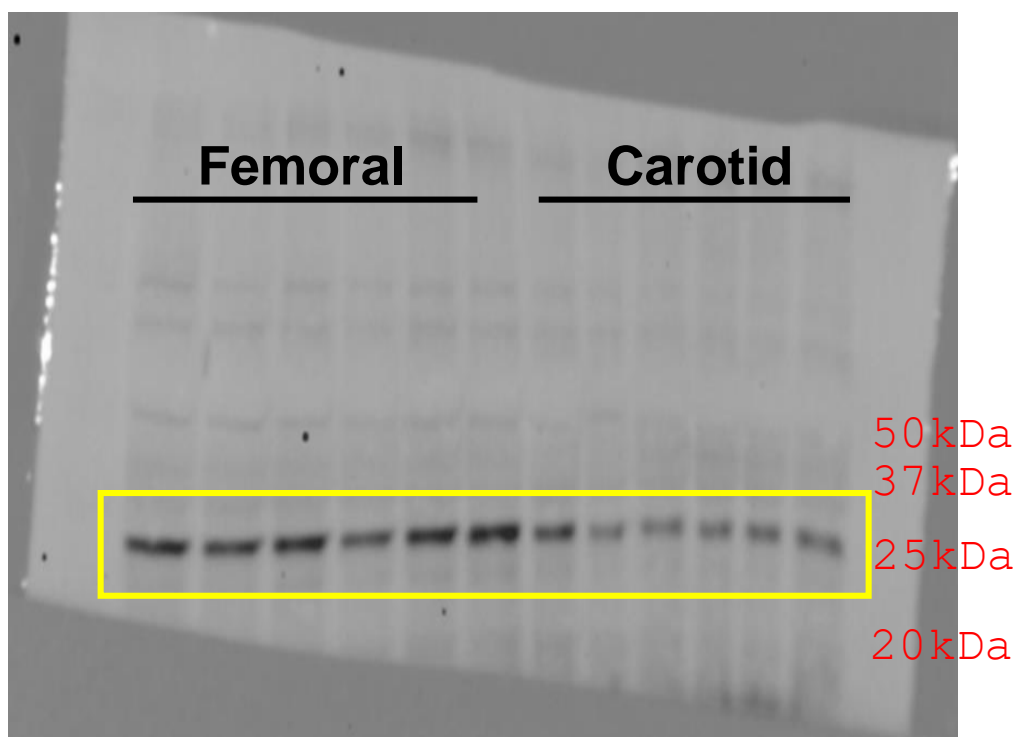

*Representative image*

### GAPDH (36kDa)

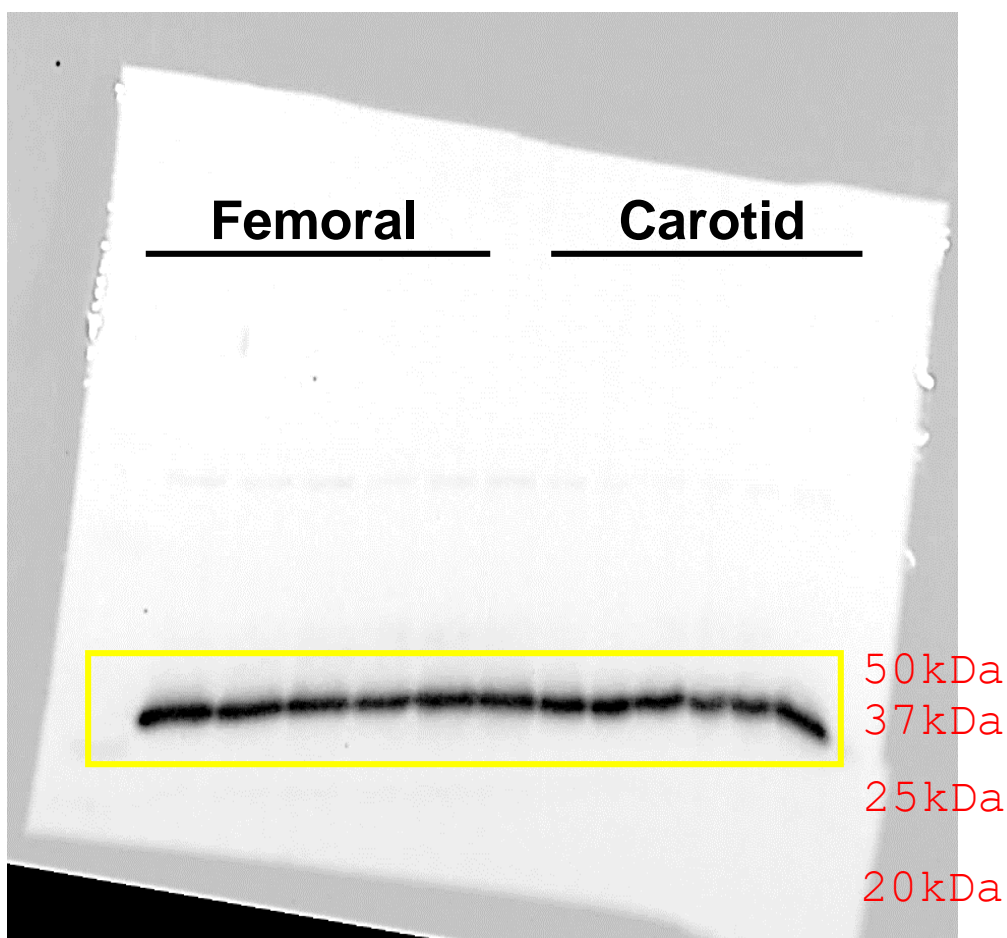

*Representative image*

**Suppl. Fig 6.** The images below are the original blots referenced in Figure 7D.

**SOD3 35 kDa**

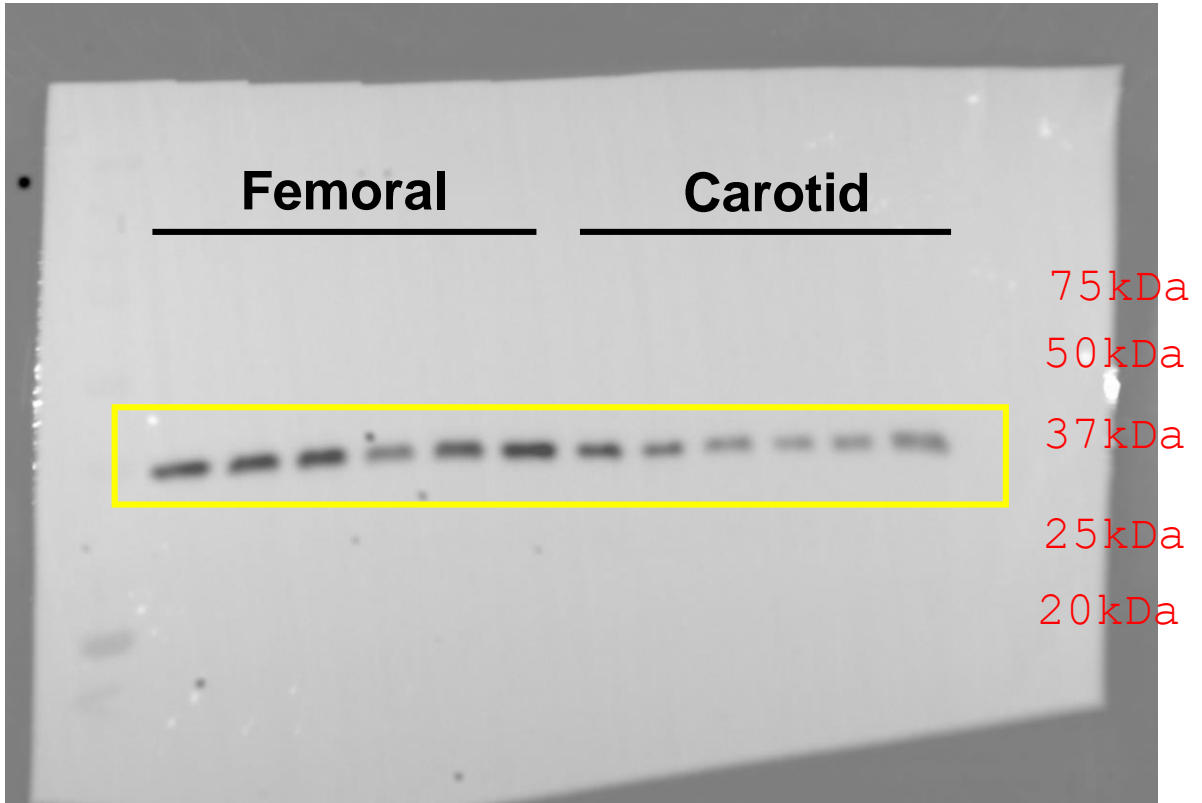

*Representative image*

**GAPDH (38kDa)**

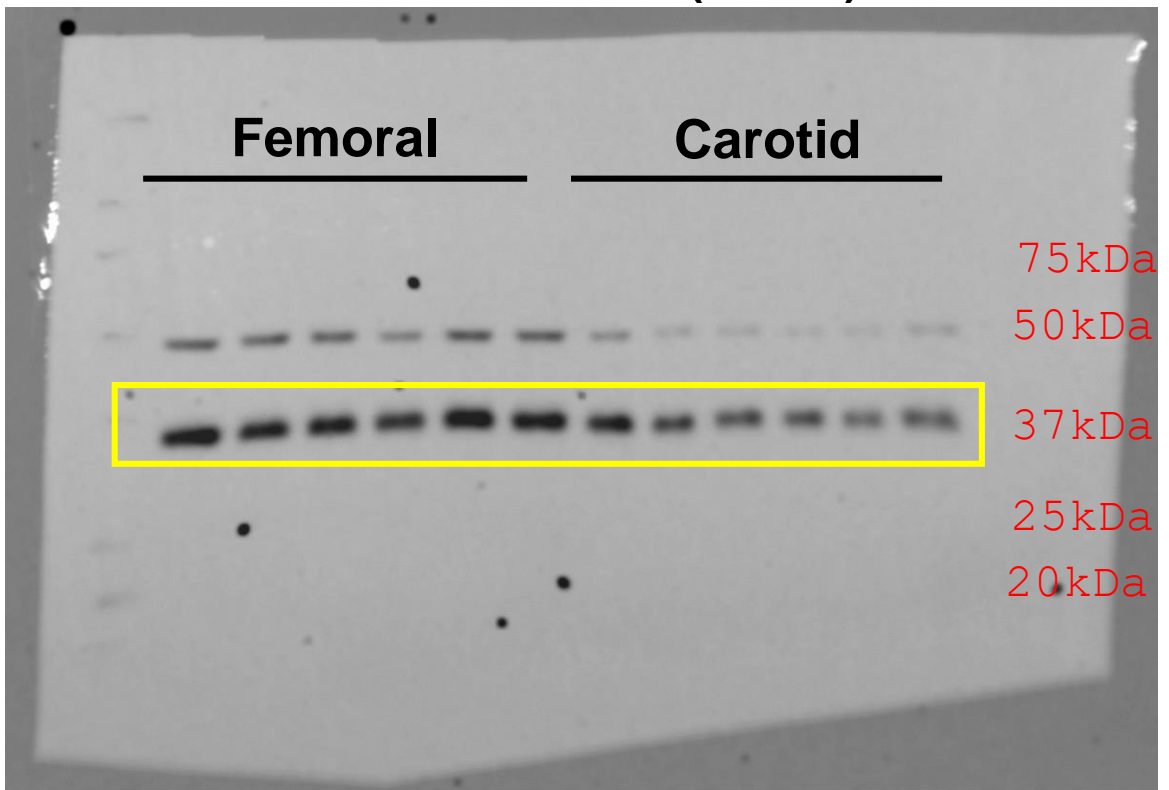

*Representative image*
